# Supplementary material
Source: Springer Nature journal article supplement (https://www.springermedizin.de/resource/supplementary/12936_2010_1663_MOESM1_ESM.pdf/9542306)

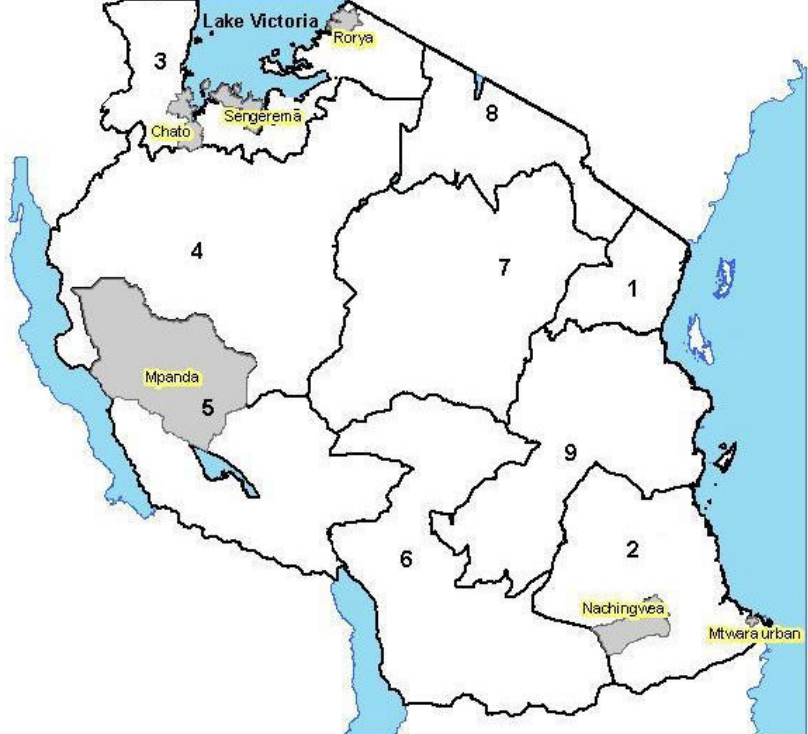

Lake Victoria

Rorya

3

Chato

Sengerema

8

4

7

1

Mpanda

5

9

6

2

Nachingwea

Mtwara urban

Supplement: MOESM1 [file 9542306]
